# Supplementary material
Source: Springer Nature journal article supplement (https://www.springermedizin.de/resource/supplementary/12889_2010_2597_MOESM1_ESM.pdf/9486596)

**Prevalence of Minor Psychiatric Disorders**

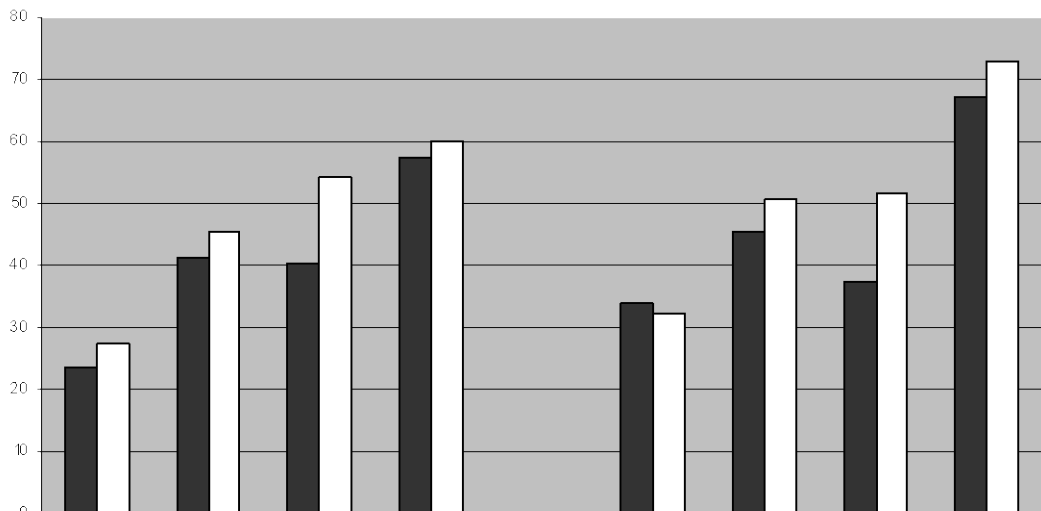

|          |    |    |    |    |  |    |    |    |    |
|----------|----|----|----|----|--|----|----|----|----|
| ■ Male   | 24 | 41 | 40 | 58 |  | 34 | 46 | 37 | 67 |
| □ Female | 28 | 46 | 54 | 60 |  | 32 | 51 | 52 | 73 |

**Psychosocial Working Conditions**

Supplement: MOESM1 [file 9486596]
